# Supplementary material for: Δ9-tetrahydrocannabinol exposure during rat pregnancy leads to symmetrical fetal growth restriction and labyrinth-specific vascular defects in the placenta
Source: PubMed Central journal article supplement (PMC6969028; doi:10.1038/s41598-019-57318-6), 2020-01-17

## **Δ9-tetrahydrocannabinol exposure during rat pregnancy leads to symmetrical fetal growth restriction and labyrinth-specific vascular defects in the placenta.**

Bryony V. Natale<sup>1,2</sup>, Katarina N. Gustin<sup>2</sup>, Kendrick Lee<sup>9,10</sup>, Alison C. Holloway<sup>4</sup>, Steven R. Laviolette<sup>5,10</sup>, David R.C. Natale<sup>\*\*1,2,3</sup>, and Daniel B. Hardy<sup>\*6-10</sup>

<sup>1</sup>Department of Obstetrics and Gynaecology, Queen's University, Kingston, Canada.

<sup>2</sup>Department of Obstetrics, Gynecology & Reproductive Sciences, School of Medicine, University of California San Diego, La Jolla, CA, USA

<sup>3</sup>Department of Biomedical and Molecular Sciences, Queen's University, Kingston, Canada.

<sup>4</sup>Department of Obstetrics and Gynecology, McMaster University, Hamilton, Canada

<sup>5</sup>Department of Anatomy and Cell Biology, <sup>6</sup>The Children's Health Research Institute,

<sup>7</sup>Lawson Health Research Institute, The Departments of <sup>8</sup>Obstetrics and Gynaecology and <sup>9</sup>Physiology and Pharmacology, <sup>10</sup>The University of Western Ontario, London, Ontario, Canada, N6A 5C1

### **Supplemental Figure and Tables:**

#### **Supplemental Table 1. Forward and reverse sequences for the rat primers used for quantitative Real-Time PCR.**

| <i>Gene</i> | <i>Forward</i>       | <i>Reverse</i>       | <i>GenBank/Reference</i> |
|-------------|----------------------|----------------------|--------------------------|
| Gcm1        | CCCCAACAGGTTCCACTAGA | AGGGGAGTGGTACGTGACAG | NM_017186                |
| Gapdh       | CAAGTTCAACGGCACAGTCA | CCCCATTTGATGTTAGCGGG | NM_017008.4              |

**Supplemental Figure 1. Exposure to 3 mg/kg Δ9-THC during gestation has no effect on expression of *Gcm1* mRNA in E19.5 placenta.** Real-time qPCR of rat placentae treated with vehicle or Δ9-THC throughout gestation beginning at E6.5. Total RNA was extracted and reverse-transcribed to cDNA and normalized to *Gapdh*. All values were expressed as mean±SEM (N=6/group).

**Relative Normalized  
*Gcm1* Expression**

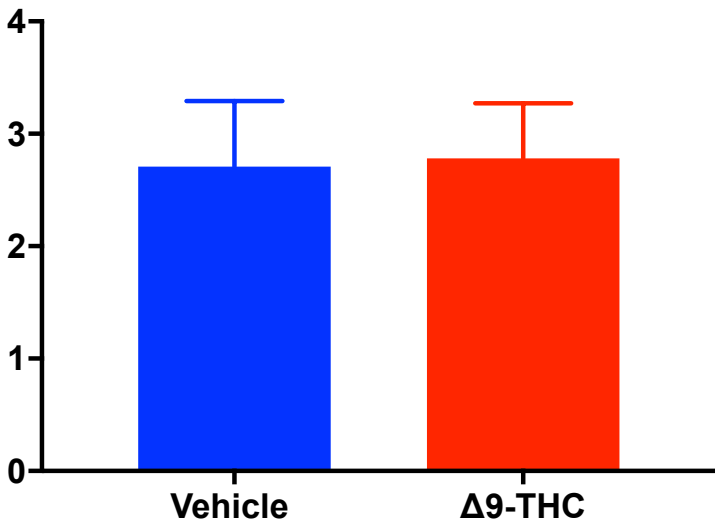

Supplement: 41598_2019_57318_MOESM1_ESM.pdf [file 41598_2019_57318_MOESM1_ESM.pdf]
